# Supplementary material for: Cyclooxygenase-2 Expression in Bladder Cancer and Patient Prognosis: Results from a Large Clinical Cohort and Meta-Analysis
Source: PLOS journal article supplement (doi:10.1371/journal.pone.0045025), 2012-09-13

Supporting Figure 1. Immunohistochemical staining of COX2 in primary UCBs on TMAs

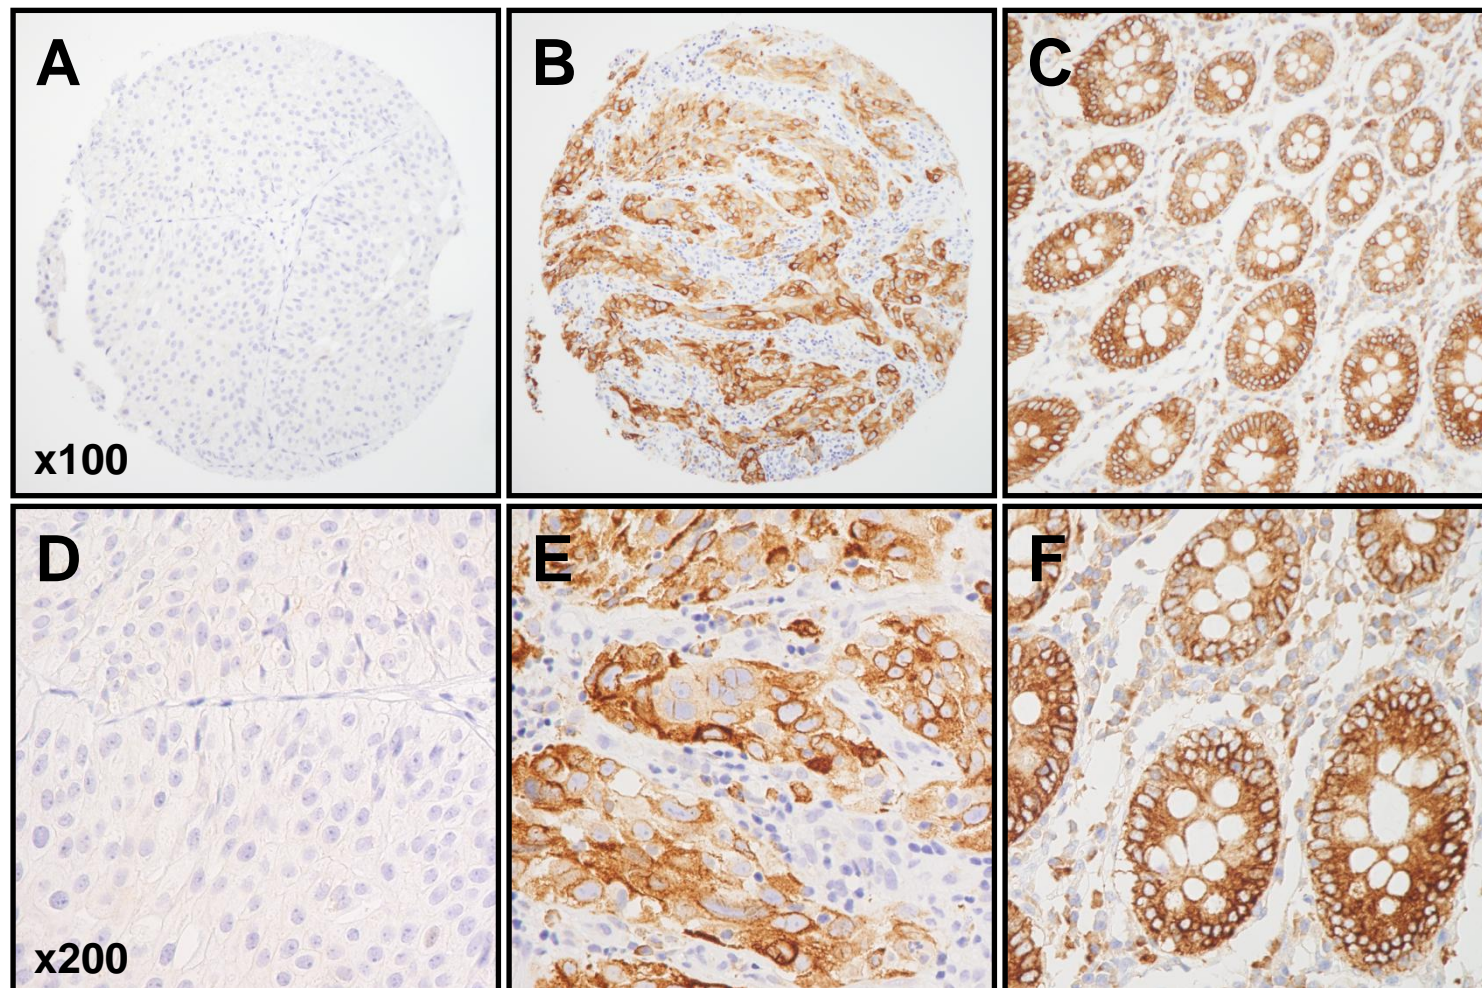

Supplement: S1 (10.1371/journal.pone.0045025.s001) [file journal.pone.0045025.s001]
