# Supplementary material for: Cyclooxygenase-2 Expression in Bladder Cancer and Patient Prognosis: Results from a Large Clinical Cohort and Meta-Analysis
Source: PLOS journal article supplement (doi:10.1371/journal.pone.0045025), 2012-09-13
Supplement: S4 (10.1371/journal.pone.0045025.s004) [file journal.pone.0045025.s004]

**Supporting Figure 4.** Flow diagram of studies included in the meta-analysis

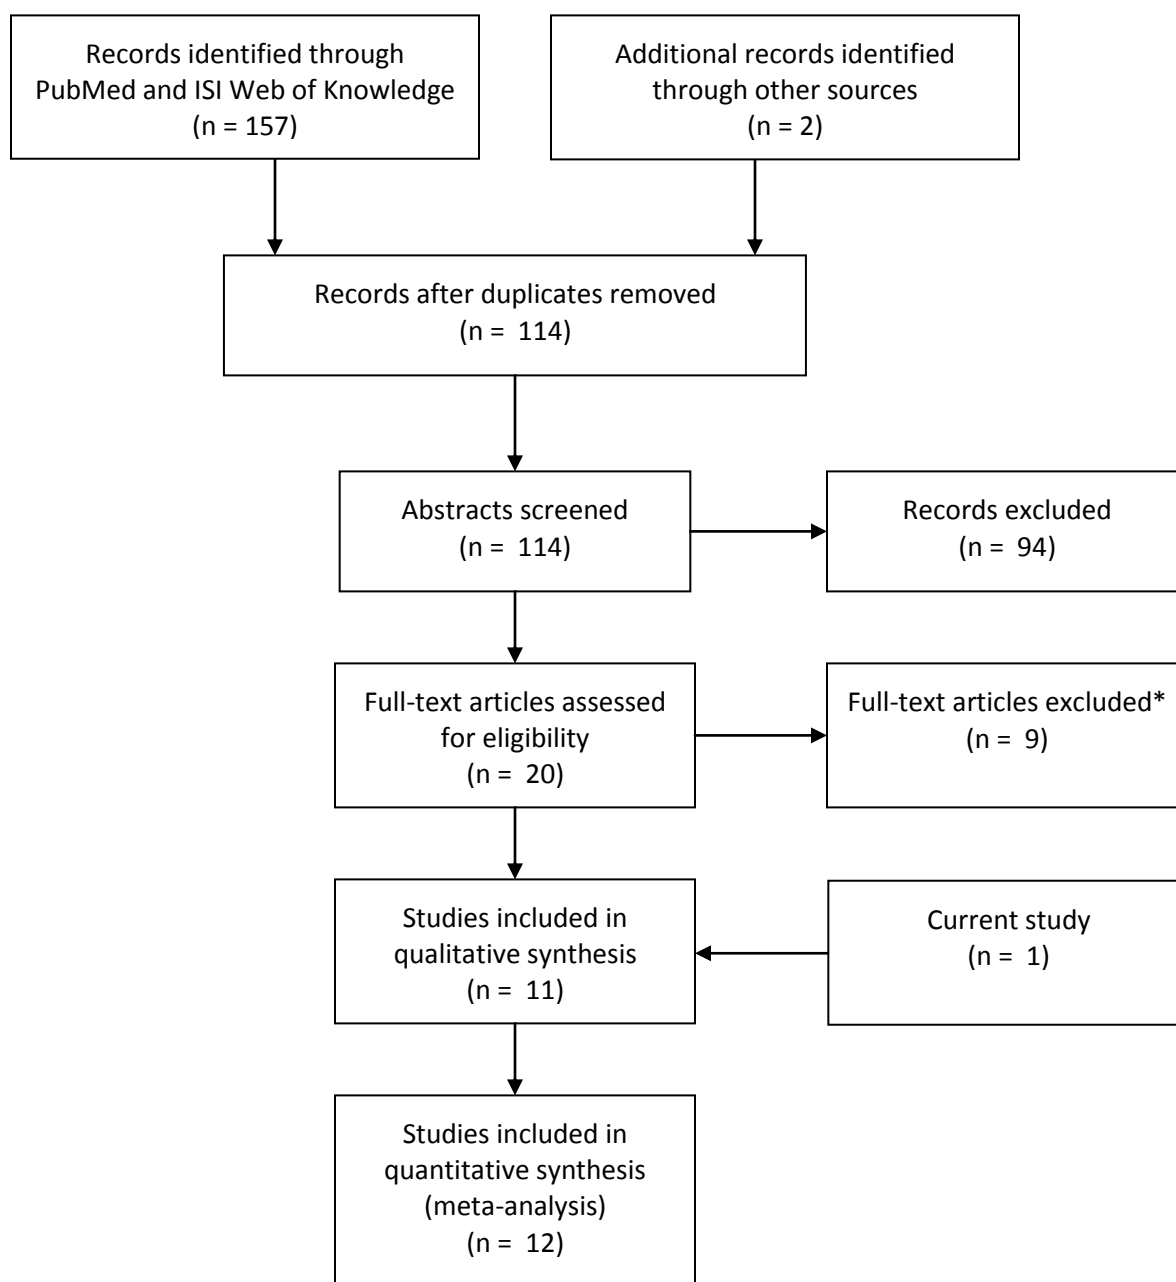

\*reasons for exclusion of full-text articles included: no reported prognostic data (n = 3), patient overlap with a larger study (n = 2), pooled analysis on superficial and invasive bladder tumors (n = 2), inclusion of tumors other than UCB in analysis (n = 1), inclusion of non-primary tumors in analysis (n = 1)
